# Supplementary material
Source: MDPI journal article supplement (https://www.mdpi.com/1999-4907/14/9/1701)
Supplement: s1 [file s1]

## **Supporting Information**

### **Source to sink of lignin phenols in a subtropical forest of southwest China**

Zongyao Qian <sup>1,2,3</sup>, Zi Fan <sup>4</sup>, Wanxia Peng <sup>2,3</sup>, Hu Du <sup>2,3</sup> and Peilei Hu <sup>2,3,\*</sup>

<sup>1</sup> School of Biological Science and Food Engineering, Chuzhou University, Chuzhou 239000, China

<sup>2</sup> Key Laboratory of Agro-Ecological Processes in Subtropical Region, Institute of Subtropical Agriculture, Chinese Academy of Sciences, Changsha 410125, China

<sup>3</sup> Huanjiang Observation and Research Station for Karst Ecosystems, Chinese Academy of Sciences, Huanjiang 547100, China

<sup>4</sup> Yunnan Key Laboratory of International Rivers and Trans-Boundary Eco-Security, Institute of International Rivers and Eco-Security, Yunnan University, Kunming 650091, China

\*Corresponding address: Institute of Subtropical Agriculture, Chinese Academy of Sciences, No. 644 Yuanda Road, Changsha, Hunan 410125, P.R.China.

E-mail: peileihu@isa.ac.cn

#### **This file includes:**

Figures S1 to S2

Table S1

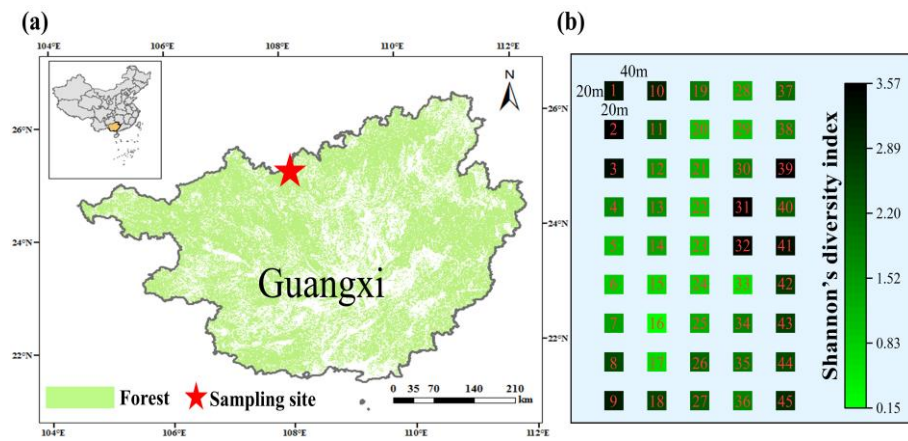

**Figure. S1** Study area and sampling sites. (a) Geographic distributions and landscape of Mulun National Natural Reserve; (b) Grid map of 45 selected sampling plots with a series of tree species diversity.

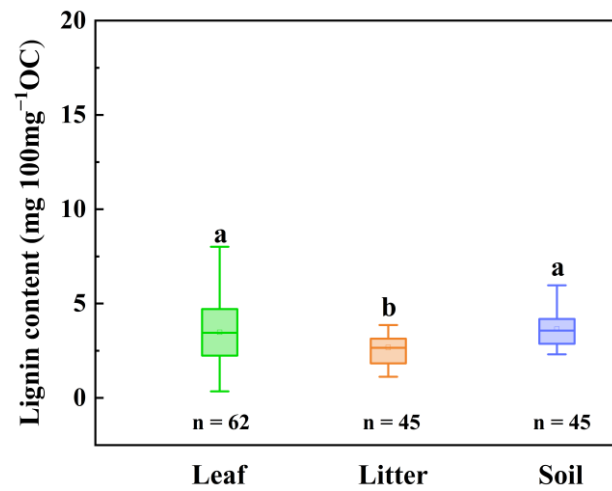

**Figure. S2** OC-normalized lignin phenol contents in plant leaf, litter, and soil. The different letters indicate significant differences between three type samples ( $P < 0.05$ ). Boxes represent the central 50% of the data and the solid line and square in each box represent the median and mean of each dataset, respectively. The upper and lower whisker caps represent the 75% and 25% percentiles, respectively.

**Table S1** The lignin and organic C content for selected plant species in this subtropical forest.

| No | Latin name                        | V-<br>mg g <sup>-1</sup> | S-<br>mg g <sup>-1</sup> | C-<br>mg g <sup>-1</sup> | Total lignin<br>mg g <sup>-1</sup> | OC content<br>mg g <sup>-1</sup> |
|----|-----------------------------------|--------------------------|--------------------------|--------------------------|------------------------------------|----------------------------------|
| 1  | <i>Mallotus philippensis</i>      | 6.11                     | 13.80                    | 3.15                     | 23.06                              | 482.1                            |
| 2  | <i>Lindera communis</i>           | 7.96                     | 7.57                     | 3.96                     | 19.49                              | 468.9                            |
| 3  | <i>Pavetta hongkongensis</i>      | 4.62                     | 4.36                     | 1.82                     | 10.81                              | 461.8                            |
| 4  | <i>Micromelum integerrimum</i>    | 12.33                    | 7.48                     | 1.68                     | 21.49                              | 482.3                            |
| 5  | <i>Alchornea trewioides</i>       | 9.73                     | 9.89                     | 0.79                     | 20.41                              | 482.8                            |
| 6  | <i>Pothos chinensis</i>           | 3.43                     | 5.74                     | 1.92                     | 11.10                              | 418.4                            |
| 7  | <i>Glycosmis parviflora</i>       | 1.43                     | 2.17                     | 0.47                     | 4.07                               | 396.6                            |
| 8  | <i>Isatis tinctoria</i>           | 2.34                     | 4.13                     | 0.51                     | 6.99                               | 457.2                            |
| 9  | <i>Toxicodendron vernicifluum</i> | 4.43                     | 4.14                     | 1.59                     | 10.16                              | 448.0                            |
| 10 | <i>Chrysanthemum oreastrum</i>    | 9.09                     | 8.45                     | 3.90                     | 21.45                              | 496.9                            |
| 11 | <i>Rubovietnamia aristata</i>     | 8.25                     | 13.21                    | 2.66                     | 24.12                              | 497.2                            |
| 12 | <i>Selaginella tamariscina</i>    | 8.87                     | 11.18                    | 3.71                     | 23.76                              | 410.0                            |
| 13 | <i>Illigera parviflora</i>        | 12.71                    | 15.56                    | 2.50                     | 30.78                              | 465.6                            |
| 14 | <i>Maesa japonica</i>             | 7.90                     | 0.60                     | 4.67                     | 13.17                              | 504.2                            |
| 15 | <i>Archidendron clypearia</i>     | 8.34                     | 10.12                    | 5.31                     | 23.77                              | 493.3                            |
| 16 | <i>Xylosma congesta</i>           | 14.81                    | 2.76                     | 7.26                     | 24.83                              | 441.3                            |
| 17 | <i>Sinoadina racemosa</i>         | 4.26                     | 6.94                     | 1.40                     | 12.61                              | 462.5                            |
| 18 | <i>Gnetum montanum</i>            | 6.86                     | 1.54                     | 1.06                     | 9.46                               | 469.5                            |
| 19 | <i>Celtis sinensis</i>            | 4.86                     | 1.56                     | 15.79                    | 22.22                              | 469.4                            |
| 20 | <i>Rhamnus davurica</i>           | 2.50                     | 7.22                     | 4.87                     | 14.59                              | 448.4                            |
| 21 | <i>Ficus hispida</i>              | 2.52                     | 10.18                    | 0.91                     | 13.61                              | 497.6                            |
| 22 | <i>Aspidistra elatior</i>         | 3.61                     | 4.10                     | 2.34                     | 10.04                              | 489.4                            |
| 23 | <i>Chukrasia tabularis</i>        | 3.26                     | 4.12                     | 0.81                     | 8.18                               | 459.7                            |
| 24 | <i>Chukrasia tabularis</i>        | 2.31                     | 1.70                     | 0.82                     | 4.83                               | 498.0                            |

| No | Latin name                      | V-<br>mg g <sup>-1</sup> | S-<br>mg g <sup>-1</sup> | C-<br>mg g <sup>-1</sup> | Total lignin<br>mg g <sup>-1</sup> | OC content<br>mg g <sup>-1</sup> |
|----|---------------------------------|--------------------------|--------------------------|--------------------------|------------------------------------|----------------------------------|
| 25 | <i>Luculia pinceana</i>         | 2.78                     | 1.75                     | 1.11                     | 5.64                               | 482.9                            |
| 26 | <i>Sansevieria trifasciata</i>  | 5.07                     | 5.55                     | 3.05                     | 13.67                              | 492.1                            |
| 27 | <i>Sansevieria trifasciata</i>  | 3.72                     | 4.17                     | 3.08                     | 10.97                              | 510.8                            |
| 28 | <i>Cleidion brevipetiolatum</i> | 9.40                     | 6.70                     | 3.56                     | 19.66                              | 467.5                            |
| 29 | <i>Rosa chinensis</i>           | 17.96                    | 4.60                     | 1.76                     | 24.31                              | 451.8                            |
| 30 | <i>Miliusa balansae</i>         | 11.22                    | 7.43                     | 0.85                     | 19.51                              | 462.2                            |
| 31 | <i>Woodfordia fruticosa</i>     | 11.13                    | 2.73                     | 1.45                     | 15.30                              | 462.3                            |
| 32 | <i>Bridelia retusa</i>          | 3.10                     | 5.19                     | 0.66                     | 8.95                               | 508.4                            |
| 33 | <i>Croton tiglium</i>           | 3.13                     | 10.80                    | 1.89                     | 15.81                              | 493.6                            |
| 34 | <i>Ventilago leiocarpa</i>      | 1.55                     | 2.31                     | 8.05                     | 11.91                              | 479.9                            |
| 35 | <i>Ficus tinctoria</i>          | 7.84                     | 4.93                     | 4.47                     | 17.25                              | 518.1                            |
| 36 | <i>Cipadessa baccifera</i>      | 9.18                     | 19.27                    | 4.90                     | 33.35                              | 457.6                            |
| 37 | <i>Eurycorymbus cavaleriei</i>  | 5.38                     | 3.23                     | 4.24                     | 12.85                              | 482.9                            |
| 38 | <i>Cryptocarya chinensis</i>    | 13.00                    | 8.93                     | 3.40                     | 25.33                              | 421.8                            |
| 39 | <i>Murraya exotica</i>          | 8.20                     | 2.98                     | 3.47                     | 14.65                              | 486.0                            |
| 40 | <i>Asplenium nidus</i>          | 3.20                     | 2.00                     | 0.50                     | 5.69                               | 512.4                            |
| 41 | <i>Bridelia tomentosa</i>       | 11.18                    | 8.24                     | 4.47                     | 23.89                              | 360.6                            |
| 42 | <i>Itoa orientalis</i>          | 9.58                     | 12.03                    | 2.58                     | 24.20                              | 463.3                            |
| 43 | <i>Micromelum falcatum</i>      | 2.55                     | 2.09                     | 4.21                     | 8.85                               | 504.6                            |
| 44 | <i>Micromelum integerrimum</i>  | 13.54                    | 3.34                     | 3.31                     | 20.19                              | 463.8                            |
| 45 | <i>Asarum heterotropoides</i>   | 6.10                     | 1.13                     | 2.40                     | 9.63                               | 493.0                            |
| 46 | <i>Platycarya strobilacea</i>   | 19.63                    | 1.20                     | 1.60                     | 22.43                              | 462.7                            |
| 47 | <i>Pothos chinensis</i>         | 7.39                     | 10.27                    | 2.35                     | 20.02                              | 449.2                            |
| 48 | <i>Liparis campylostalix</i>    | 13.50                    | 2.86                     | 2.48                     | 18.84                              | 436.8                            |
| 49 | <i>Epipremnum pinnatum</i>      | 6.67                     | 12.86                    | 0.30                     | 19.83                              | 471.5                            |
| 50 | <i>Platycarya longipes</i>      | 17.00                    | 0.17                     | 3.93                     | 21.11                              | 416.4                            |

| No | Latin name                              | V-<br>mg g <sup>-1</sup> | S-<br>mg g <sup>-1</sup> | C-<br>mg g <sup>-1</sup> | Total lignin<br>mg g <sup>-1</sup> | OC content<br>mg g <sup>-1</sup> |
|----|-----------------------------------------|--------------------------|--------------------------|--------------------------|------------------------------------|----------------------------------|
| 51 | <i>Phanera championii</i>               | 8.09                     | 6.74                     | 2.17                     | 17.00                              | 439.5                            |
| 52 | <i>Elatostema parvum</i>                | 1.96                     | 1.22                     | 0.24                     | 3.42                               | 383.9                            |
| 53 | <i>Phyllanthodendron anthopotamicum</i> | 2.53                     | 2.92                     | 1.65                     | 7.10                               | 442.3                            |
| 54 | <i>Begonia grandis</i>                  | 0.59                     | 0.67                     | 0.33                     | 1.60                               | 466.4                            |
| 55 | <i>Litsea lancifolia</i>                | 6.19                     | 12.60                    | 1.39                     | 20.18                              | 328.2                            |
| 56 | <i>Alchornea davidii</i>                | 7.77                     | 6.51                     | 2.32                     | 16.60                              | 421.6                            |
| 57 | <i>Boehmeria nivea</i>                  | 2.04                     | 0.39                     | 0.26                     | 2.68                               | 459.2                            |
| 58 | <i>Selaginella uncinata</i>             | 5.21                     | 15.19                    | 0.58                     | 20.98                              | 422.1                            |
| 59 | <i>Illigera parviflora</i>              | 3.87                     | 2.62                     | 8.86                     | 15.35                              | 462.7                            |
| 60 | <i>Brassaiopsis glomerulata</i>         | 4.85                     | 2.65                     | 0.54                     | 8.03                               | 449.2                            |
| 61 | <i>Swida parviflora</i>                 | 7.77                     | 15.86                    | 0.25                     | 23.88                              | 436.8                            |
| 62 | <i>Pterospermum heterophyllum</i>       | 3.23                     | 8.82                     | 3.78                     | 15.83                              | 416.4                            |
